# Supplementary material
Source: PubMed Central journal article supplement (PMC6129475)
Supplement: mmc1.pdf [file mmc1.pdf]

**Biophysical Journal, Volume 114**

**Supplemental Information**

**Femtosecond Hydration Map of Intrinsically Disordered  $\alpha$ -Synuclein**

**Shruti Arya, Avinash K. Singh, Karishma Bhasne, Priyanka Dogra, Anindya Datta, Payel Das, and Samrat Mukhopadhyay**

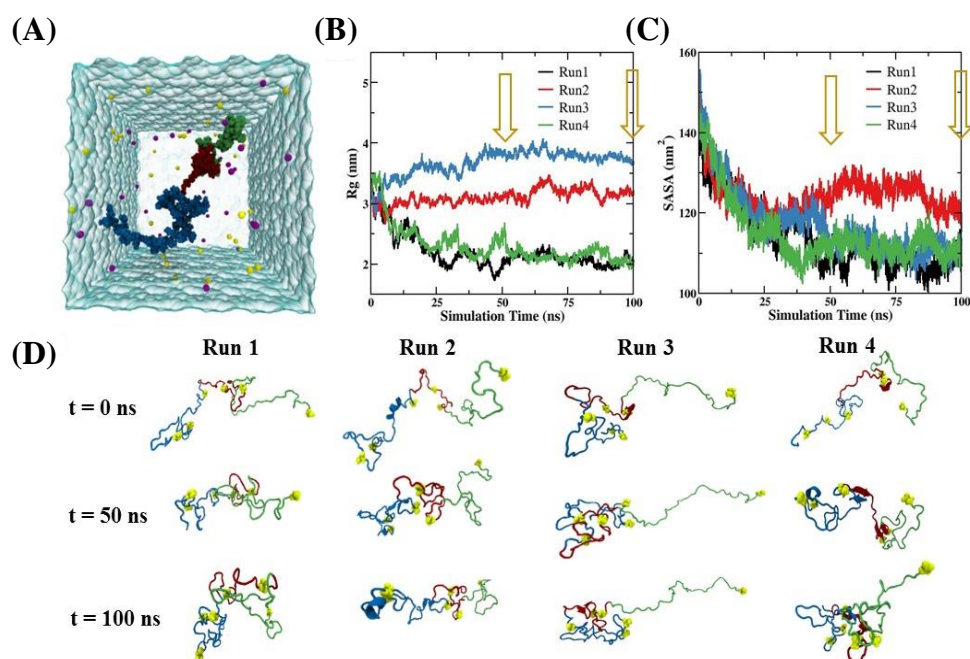

**Figure S1** (A) The simulation system of  $\alpha$ -syn in water. The protein chain and ions are shown using van der Waals (vdW) spheres (N-domain in blue, NAC-domain in red, and C-domain in green,). The water box is shown in cyan using molecular surface representation. Sodium ions are shown in yellow and chloride ions are shown in purple. (B-C) Evolution of  $R_g$  (nm) and SASA ( $\text{nm}^2$ ) during four 100-ns long MD trajectories. Yellow arrows indicate the starting points for shorter 10-ns runs used for hydration water analysis. (D) Snapshots of protein structures (shown in cartoon representation) at 0 ns, 50 ns, and 100 ns from four different runs. Six residue positions used in our ultrafast experiments are shown using yellow vdW spheres.

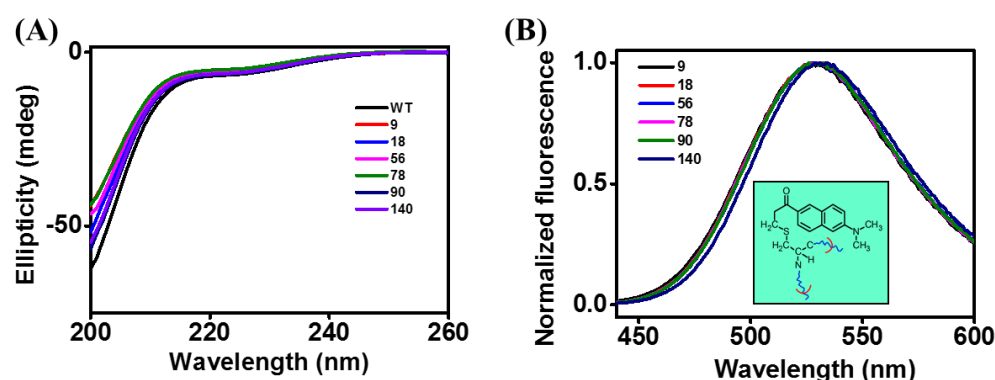

**Figure S2** (A) CD spectra of wild-type and cysteine variants of  $\alpha$ -synuclein. The CD spectra were recorded on a Chirascan CD spectrometer (Applied Photophysics, UK) at room temperature using 1 mm path length quartz cuvette. The protein concentration was 25  $\mu\text{M}$ . (B) The steady-state fluorescence spectra for all acrylodan labeled single cysteine variants of  $\alpha$ -synuclein.

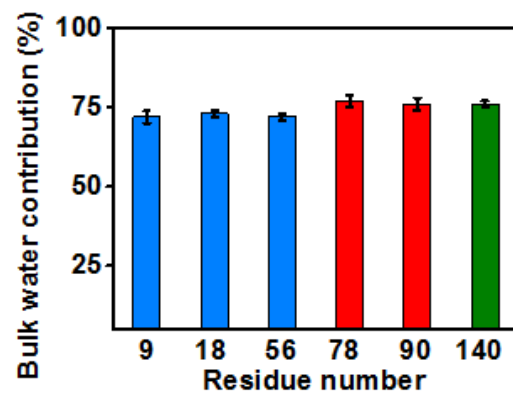

**Figure S3** The contribution of bulk water obtained from fitting the solvation correlation function for acrylodan labeled cysteine variants of  $\alpha$ -synuclein.

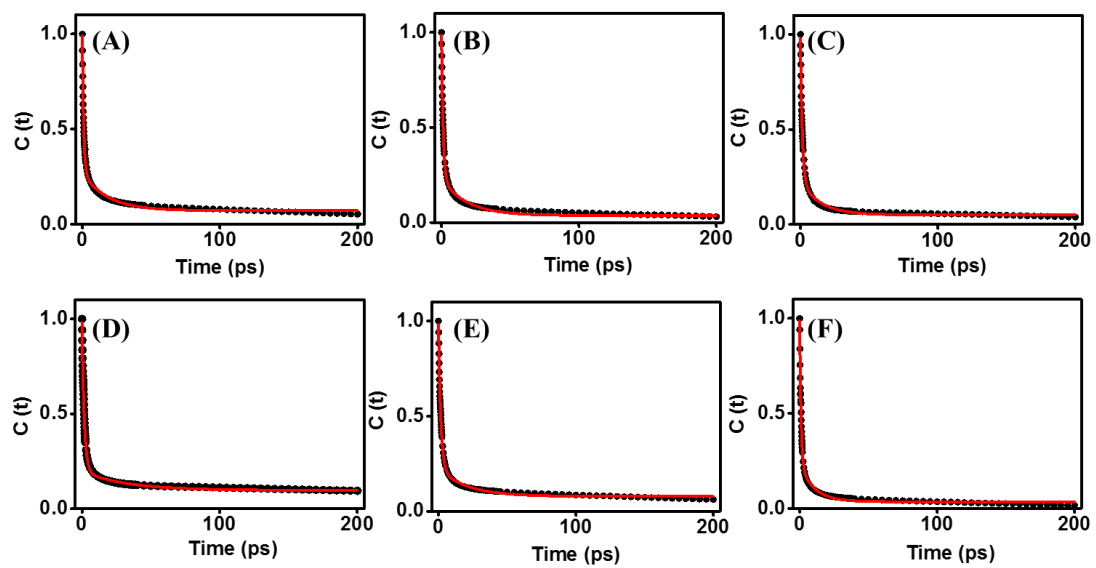

**Figure S4** Representative individual  $C(t)$  plots (from 0 to 200 ps) for all acrylodan labeled cysteine variants of  $\alpha$ -synuclein (A: 9, B: 18, C: 56, D: 78, E: 90, F: 140) are shown.

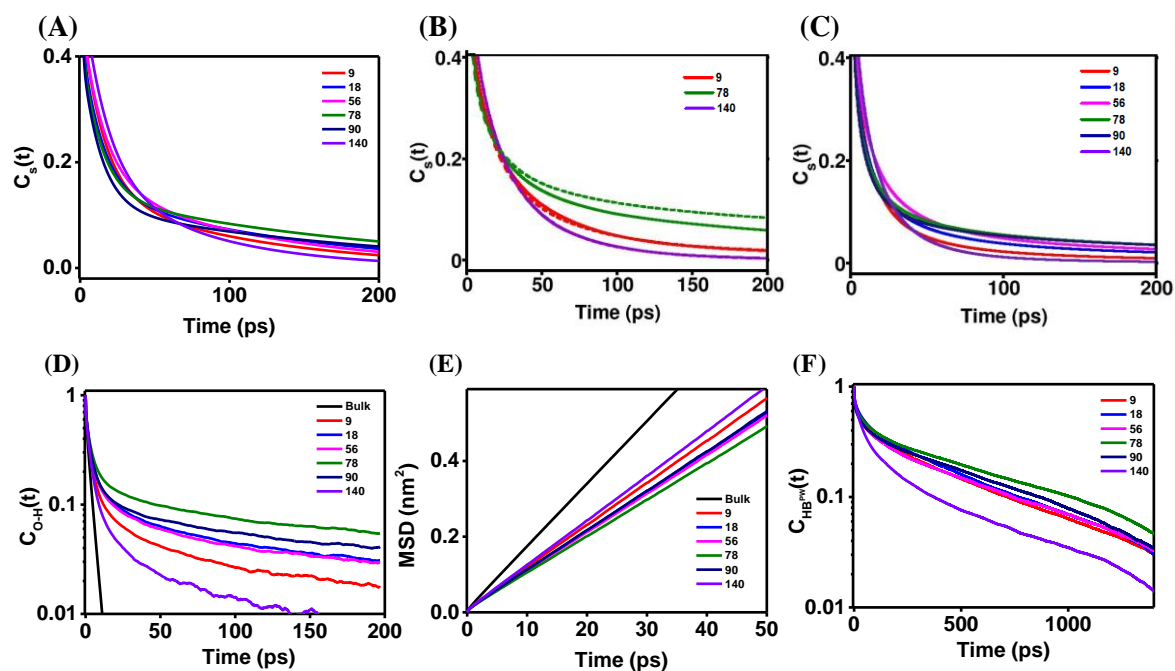

**Figure S5** (A) Survival probability functions [ $C_s(t)$ ] of hydration water molecules in the  $\alpha$ -syn hydration shell around 6 different sites using SPC/E water model. (B)  $C_s(t)$  of SPC/E hydration water around residue 9, 78, and 140, as obtained from two different runs [Run 1 (solid line); Run 2 (dashed line) from the same starting structure]. (C)  $C_s(t)$  profiles of TIP3P hydration water molecules around 6 different sites. (D) Linear-log plot of second-order re-orientational time correlation function  $C_{O-H}(t)$  for all O-H bonds of hydration shell waters. (E) Mean square displacement, MSD, (in  $\text{nm}^2$ ) as function of time (in ps) of hydration shell water. Black line in (D) and (E) represents data corresponding to bulk water. (F) Linear-log plot of protein-water H-bond time correlation functions,  $C_{HB^m}(t)$ .

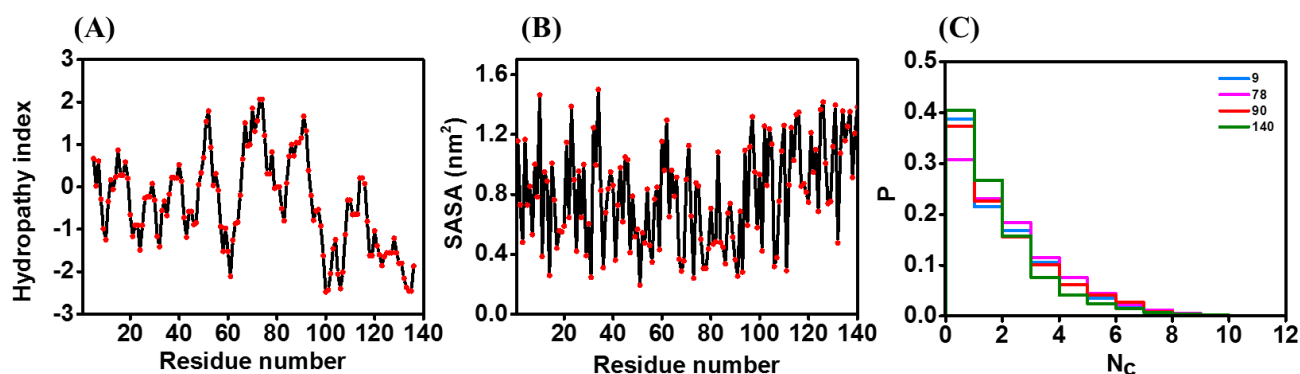

**Figure S6** (A) Kyte & Doolittle hydropathy index of  $\alpha$ -syn sequence estimated using the ProtScale webserver (<http://web.expasy.org/protscale/>) with a window size of 9. (B) Solvent accessible surface area (SASA) in  $\text{nm}^2$  per residue of  $\alpha$ -syn, as obtained from MD. (C). Probability distributions of number of protein sidechain carbon atoms that are within  $4.5 \text{ \AA}$  of hydration water.

**Table S1.** Both forward and reverse primer sequences for the single cysteine variants of  $\alpha$ -synuclein

| <b>Primer name</b> | <b>Primer sequence 5'-3'</b>               |
|--------------------|--------------------------------------------|
| <b>S9C Fwd</b>     | GAAAGGACTTTGTAAGGCCAAGGAGGG                |
| <b>S9C Rev</b>     | CCCTCCTTGGCCTTTGAAAGTCCTTC                 |
| <b>A18C Fwd</b>    | GGGAGTTGTGGCTTGTGCTGAGAAAACCAACAGGG        |
| <b>A18C Rev</b>    | CCCTGTTTGGTTTTCTCAGCACAAAGCCACAACCTCCC     |
| <b>A56C Fwd</b>    | GGTGTGGCAACAGTGTGTGAGAAGACC                |
| <b>A56C Rev</b>    | GCTCTTTGGTCTTCTCACACACTGTTGC               |
| <b>A78C Fwd</b>    | GGTGTGACAGCAGTATGCCAGAAGACAG               |
| <b>A78C Rev</b>    | CTCCACTGTCTTCTGGCATACTGCTGTC               |
| <b>A90C Fwd</b>    | GCAGGGAGCATTGCATGTGCCACTGGCTTTGTC          |
| <b>A90C Rev</b>    | GACAAAGCCAGTGGCACATGCAATGCTCCCTGC          |
| <b>A140C Fwd</b>   | CAAGACTACGAACCTGAATGCTAAGAAATATCTTTGCTCC   |
| <b>A140C Rev</b>   | GGAGCAAACATATTTCTTAGCATTTCAGGTTTCGTAGTCTTG |

**Table S2.** Recovered solvation time components and their amplitudes obtained upon fitting the hydration correlation function  $C(t) = \alpha_{bulk}e^{-t/\tau_{bulk}} + \alpha_{type-I}e^{-t/\tau_{type-I}}$ 

| Residue number | $\tau_{bulk}$ (ps) | $\alpha_{bulk}$ | $\tau_{type-I}$ (ps) | $\alpha_{type-I}$ | $\alpha_{type-II}$ (Unrelaxed component) |
|----------------|--------------------|-----------------|----------------------|-------------------|------------------------------------------|
| 9              | 1.0 $\pm$ 0.1      | 0.74 $\pm$ 0.02 | 19 $\pm$ 2           | 0.20 $\pm$ 0.02   | 0.06 $\pm$ 0.01                          |
| 18             | 1.4 $\pm$ 0.2      | 0.74 $\pm$ 0.02 | 18 $\pm$ 2           | 0.20 $\pm$ 0.01   | 0.06 $\pm$ 0.01                          |
| 56             | 1.4 $\pm$ 0.1      | 0.75 $\pm$ 0.04 | 15 $\pm$ 2           | 0.19 $\pm$ 0.03   | 0.07 $\pm$ 0.01                          |
| 78             | 1.8 $\pm$ 0.1      | 0.77 $\pm$ 0.02 | 31 $\pm$ 4           | 0.10 $\pm$ 0.02   | 0.12 $\pm$ 0.02                          |
| 90             | 1.6 $\pm$ 0.1      | 0.76 $\pm$ 0.02 | 21 $\pm$ 2           | 0.15 $\pm$ 0.02   | 0.09 $\pm$ 0.02                          |
| 140            | 1.1 $\pm$ 0.1      | 0.79 $\pm$ 0.03 | 11 $\pm$ 1           | 0.20 $\pm$ 0.02   | 0.03 $\pm$ 0.01                          |

The up-conversion data were fitted up to 200 ps, as shown in Figure 3. The recovered solvation times are referred to as  $\tau_{bulk}$  and  $\tau_{type-I}$  and their respective amplitudes (fractional contributions) as  $\alpha_{bulk}$  and  $\alpha_{type-I}$ . The amplitude of the (unrelaxed) residual solvation component is denoted as  $\alpha_{type-II}$  and equals to  $1 - (\alpha_{bulk} + \alpha_{type-I})$ .

**Table S3.** Residence times (in ps) from tri-exponential fit of survival probability function  $C_s(t) = \alpha_1^s e^{-t/\tau_1^s} + \alpha_2^s e^{-t/\tau_2^s} + (1 - \alpha_1^s - \alpha_2^s) e^{-t/\tau_3^s}$ 

| Residue number | $\tau_1^s$ (ps) | $\alpha_1^s$ | $\tau_2^s$ (ps) | $\alpha_2^s$ | $\tau_3^s$ (ps) | $\alpha_3^s$ |
|----------------|-----------------|--------------|-----------------|--------------|-----------------|--------------|
| 9              | 0.84            | 0.50         | 14.48           | 0.35         | 110.7           | 0.15         |
| 18             | 0.83            | 0.55         | 13.87           | 0.31         | 144.47          | 0.14         |
| 56             | 0.84            | 0.51         | 15.14           | 0.33         | 117.87          | 0.17         |
| 78             | 0.83            | 0.56         | 13.09           | 0.30         | 196.89          | 0.14         |
| 90             | 0.80            | 0.57         | 12.68           | 0.31         | 189.11          | 0.12         |
| 140            | 0.75            | 0.44         | 16.38           | 0.37         | 76.10           | 0.18         |

The residence times ( $\tau_1^s$ ,  $\tau_2^s$ , and  $\tau_3^s$ ) and corresponding amplitudes ( $\alpha_1^s$ ,  $\alpha_2^s$ , and  $\alpha_3^s$ ) were extracted by fitting the 200 ps portion of  $C_s(t)$  of hydration water to the tri-exponential function, such as  $\alpha_1^s + \alpha_2^s + \alpha_3^s = 1$  (see Figure S5A).  $\tau_1^s$ ,  $\tau_2^s$ , and  $\tau_3^s$  correspond to the bulk water, type-I bound water, and type-II bound water, respectively.

**Table S4.** Translational self-diffusion constant [D (in  $\times 10^{-5} \text{ cm}^2\text{s}^{-1}$ )] and tri-exponential fitting parameters of O-H reorientational time-correlation function  $C_{O-H}(t) = \alpha_1^{O-H} e^{-t/\tau_1^{O-H}} + \alpha_2^{O-H} e^{-t/\tau_2^{O-H}} + (1 - \alpha_1^{O-H} - \alpha_2^{O-H}) e^{-\frac{t}{\tau_3^{O-H}}}$

| Residue number | D ( $\text{nm}^2\text{s}^{-1}$ ) | $\tau_1^{O-H}$ (ps) | $\alpha_1^{O-H}$ | $\tau_2^{O-H}$ (ps) | $\alpha_2^{O-H}$ | $\tau_3^{O-H}$ (ps) | $\alpha_3^{O-H}$ |
|----------------|----------------------------------|---------------------|------------------|---------------------|------------------|---------------------|------------------|
| <b>Bulk</b>    | 2.76                             | 0.16                | 0.30             | 2.40                | 0.70             | -                   | -                |
| <b>9</b>       | 1.91                             | 0.18                | 0.34             | 3.10                | 0.56             | 55.10               | 0.11             |
| <b>18</b>      | 1.82                             | 0.19                | 0.33             | 3.30                | 0.53             | 68.10               | 0.14             |
| <b>56</b>      | 1.85                             | 0.19                | 0.34             | 3.30                | 0.53             | 66.80               | 0.13             |
| <b>78</b>      | 1.78                             | 0.20                | 0.33             | 3.48                | 0.51             | 98.44               | 0.16             |
| <b>90</b>      | 1.84                             | 0.19                | 0.34             | 3.30                | 0.53             | 89.60               | 0.13             |
| <b>140</b>     | 1.99                             | 0.18                | 0.33             | 2.96                | 0.59             | 38.07               | 0.25             |

The reorientational time constants in ps ( $\tau_1^{O-H}$ ,  $\tau_2^{O-H}$ , and  $\tau_3^{O-H}$ ) and corresponding amplitudes ( $\alpha_1^{O-H}$ ,  $\alpha_2^{O-H}$ , and  $\alpha_3^{O-H}$ ) extracted from the tri-exponential fit of  $C_{O-H}(t)$ , see Figure S5D.  $\tau_1^{O-H}$ ,  $\tau_2^{O-H}$ , and  $\tau_3^{O-H}$  represent fast libration motion of water, whereas  $\tau_2^{O-H}$  and  $\tau_3^{O-H}$  describe slow water relaxation. Self-diffusion constant (D) was estimated from mean-square displacement plot of hydration and bulk water (See Figure S5E).

**Table S5.** Protein-water H-bond lifetimes (in ps) from tri-exponential fit of  $C_{HB-PW}(t) = \alpha_1^{HB} e^{-t/\tau_1^{HB}} + \alpha_2^{HB} e^{-t/\tau_2^{HB}} + (1 - \alpha_1^{HB} - \alpha_2^{HB}) e^{-\frac{t}{\tau_3^{HB}}}$

| Residue number | $\tau_1^{HB}$ (ps) | $\alpha_1^{HB}$ | $\tau_2^{HB}$ (ps) | $\alpha_2^{HB}$ | $\tau_3^{HB}$ (ps) | $\alpha_3^{HB}$ |
|----------------|--------------------|-----------------|--------------------|-----------------|--------------------|-----------------|
| <b>9</b>       | 1.12               | 0.27            | 43.98              | 0.35            | 530.6              | 0.38            |
| <b>18</b>      | 0.89               | 0.26            | 46.12              | 0.32            | 534.4              | 0.42            |
| <b>56</b>      | 0.72               | 0.32            | 48.29              | 0.33            | 594.9              | 0.35            |
| <b>78</b>      | 0.61               | 0.31            | 48.87              | 0.30            | 724.3              | 0.39            |
| <b>90</b>      | 0.36               | 0.33            | 39.41              | 0.29            | 637.6              | 0.38            |
| <b>140</b>     | 3.30               | 0.30            | 50.36              | 0.48            | 484.7              | 0.22            |

The protein-water H-bond lifetimes ( $\tau_1^{HB}$ ,  $\tau_2^{HB}$ , and  $\tau_3^{HB}$ ) and corresponding amplitudes ( $\alpha_1^{HB}$ ,  $\alpha_2^{HB}$ , and  $\alpha_3^{HB}$ ) extracted from the tri-exponential fit of  $C_{HB}^{PW}(t)$  (See Figure 5D and Figure S5F).
